# Supplementary material for: Antiadherent AgBDC Metal–Organic Framework Coating for Escherichia coli Biofilm Inhibition
Source: MDPI journal article supplement (doi:10.3390/pharmaceutics15010301), 2023-01-16
Supplement: s1 [file s1]

# Supporting Information

## Antiadherent AgBDC Metal-Organic Framework Coating for *Escherichia coli* Biofilm Inhibition

### 1. Material characterization

AgBDC: Brown solid, yield 43 %. FTIR ( $\nu$ ,  $\text{cm}^{-1}$ ): 740, 528, 454 (O-Ag-O), 670 – 1228 (C-H), 1492 (COO). PXRD ( $2\theta$  ( $^\circ$ )<sub>[h k l]</sub>): 13.2 <sub>[1 0 0]</sub>, 16.6 <sub>[1 1 0]</sub>, 18.8 <sub>[1 1 -1]</sub>, 25.1 <sub>[0 2 1]</sub>, 25.6 <sub>[1 1 1]</sub>, 28.3 <sub>[2 1 0]</sub>, 30.90 <sub>[1 2 1]</sub>, 32. <sub>[2 2 -1]</sub>, 34.2 <sub>[1 3 -1]</sub>, 40.6 <sub>[2 3 0]</sub>, 42.6 <sub>[1 4 0]</sub>. TGA (wt.%): 56%.

FTIR analysis confirmed the formation of the bond between silver and the carboxylates with the vibrational band  $\nu(\text{C-O})$  at  $1492 \text{ cm}^{-1}$ . Similarly, vibrational bands Ag-O at  $740 \text{ cm}^{-1}$  and the bending vibrations of the Ag-O fragment at  $528$  and  $448 \text{ cm}^{-1}$  were also observed (Figure S1). All these results are in agreement with preceding stated characterization [41].

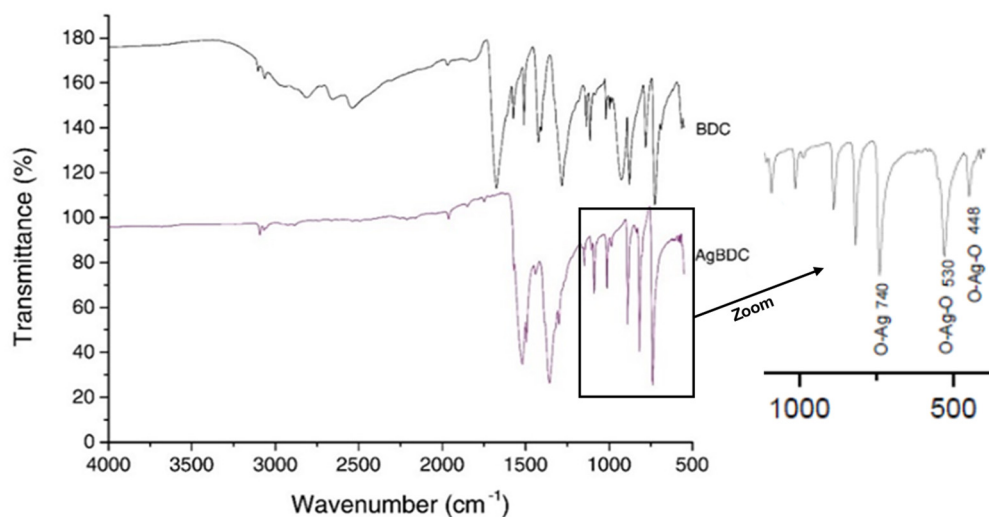

**Figure S1.** FTIR spectra of ligand BDC (up) and AgBDC MOF (down).

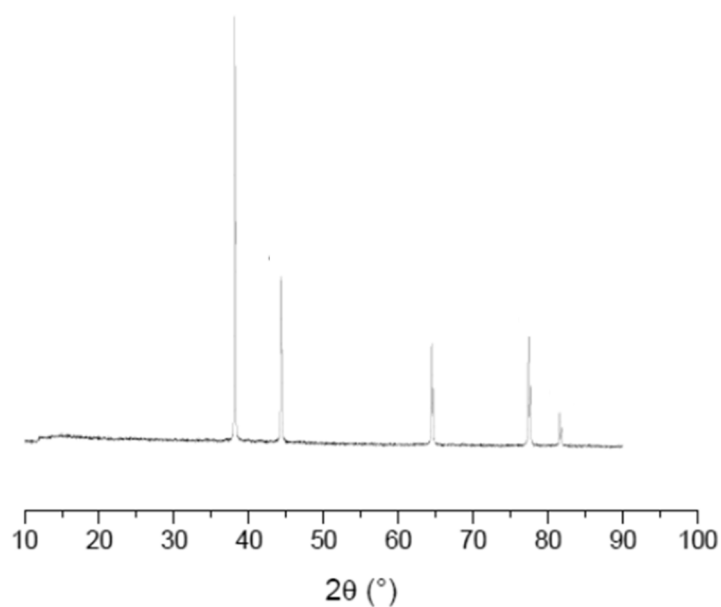

**Figure S2.** XRPD patterns of the remaining solid residue of AgBDC after TGA measurement.

## 2. AgBDC stability suspended in biological media

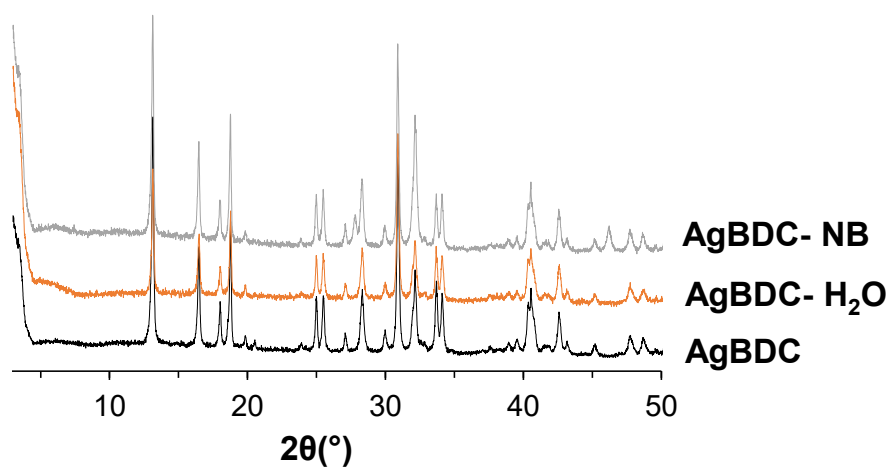

**Figure S3.** XRPD patterns of AgBDC as synthesized (bottom, black) and after 18 h incubation at 37 °C in DI water (medium, orange) and NB (top, grey).

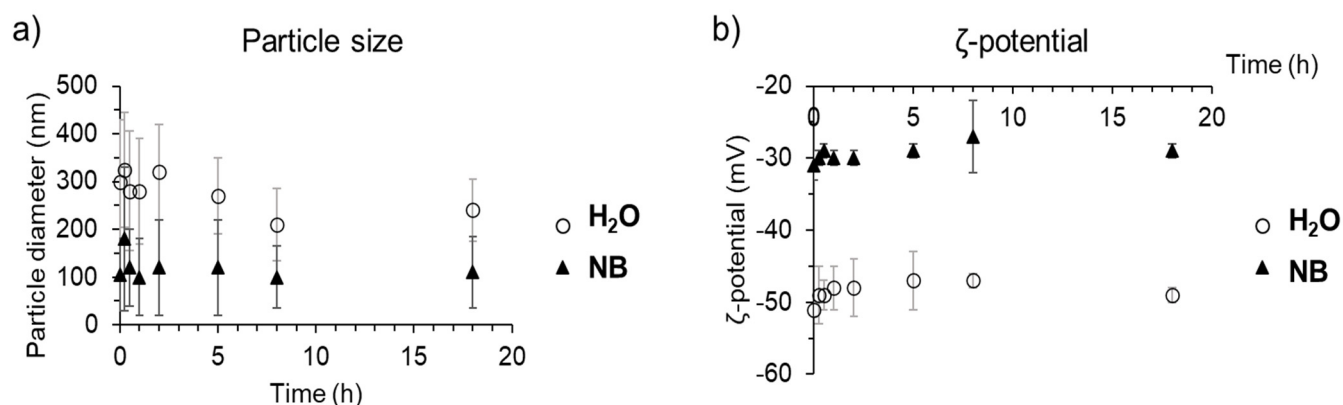

**Figure S4.** Analysis of AgBDC (a) particle size and (b) colloidal stability with time at 37°C in suspension with water (circles) and NB (triangles).

### 3. AgBDC thin film stability in biological media

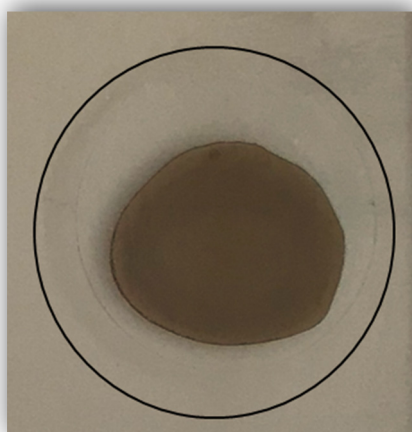

**Figure S5.** Glass disc with an AgBDC thin film coating.

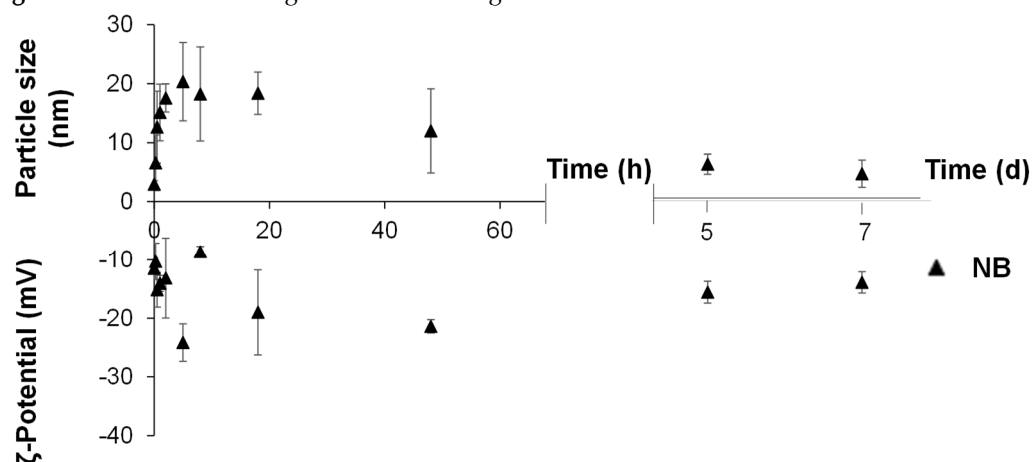

**Figure S6.** Particle size and  $\zeta$ -potential as a function of the time of the supernatant NB medium in contact with the thin film coating of AgBDC incubated at 37 °C.

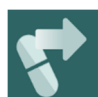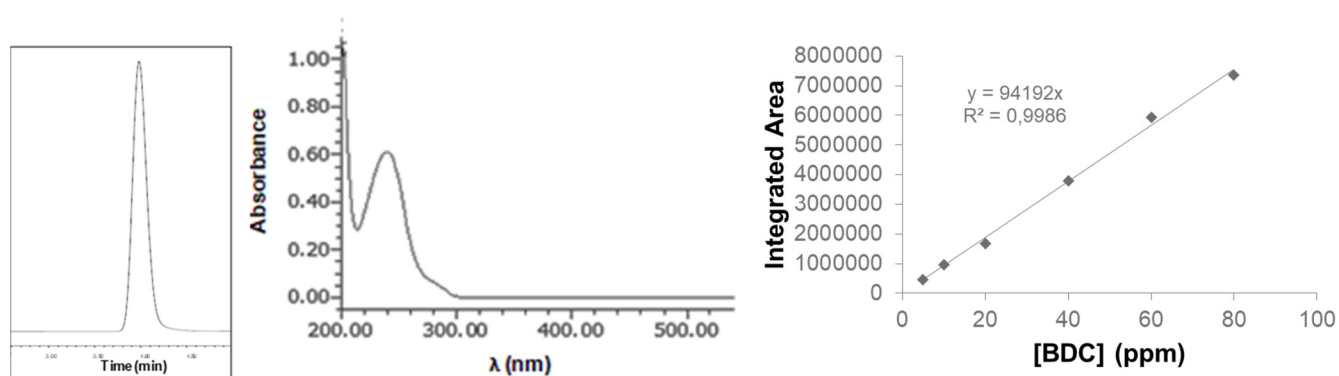

Figure S7. Chromatogram of BDC, UV-vis spectrum and calibration plot of standards by HPLC method.

#### 4. Determination of AgBDC bactericidal activity

### *S. aureus*

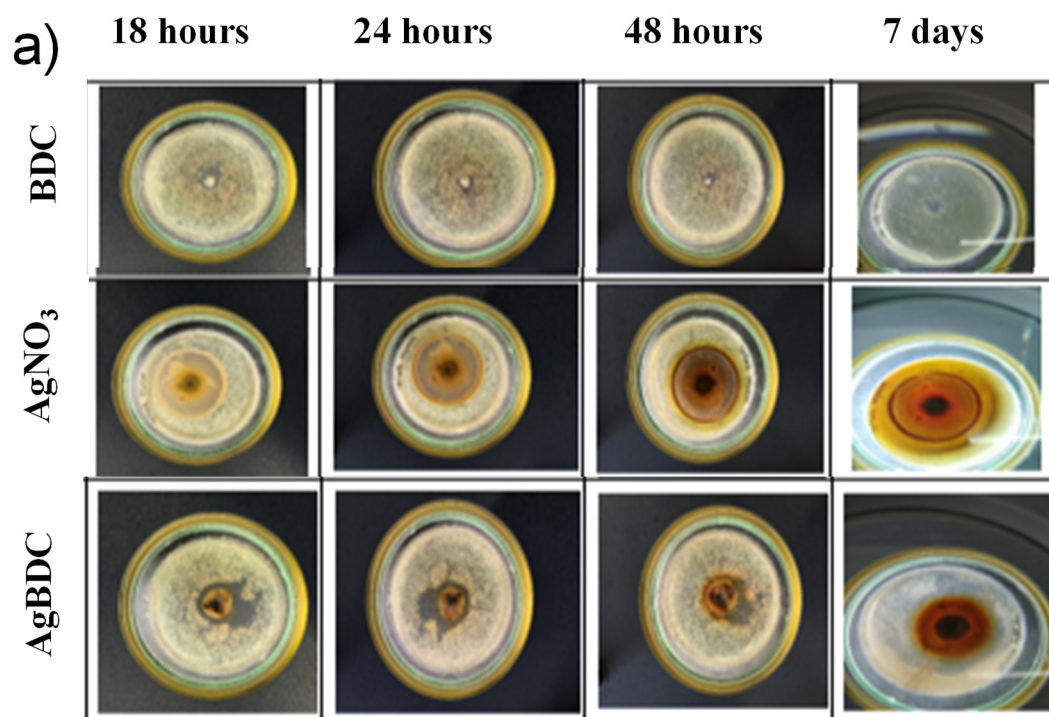

### *E. coli*

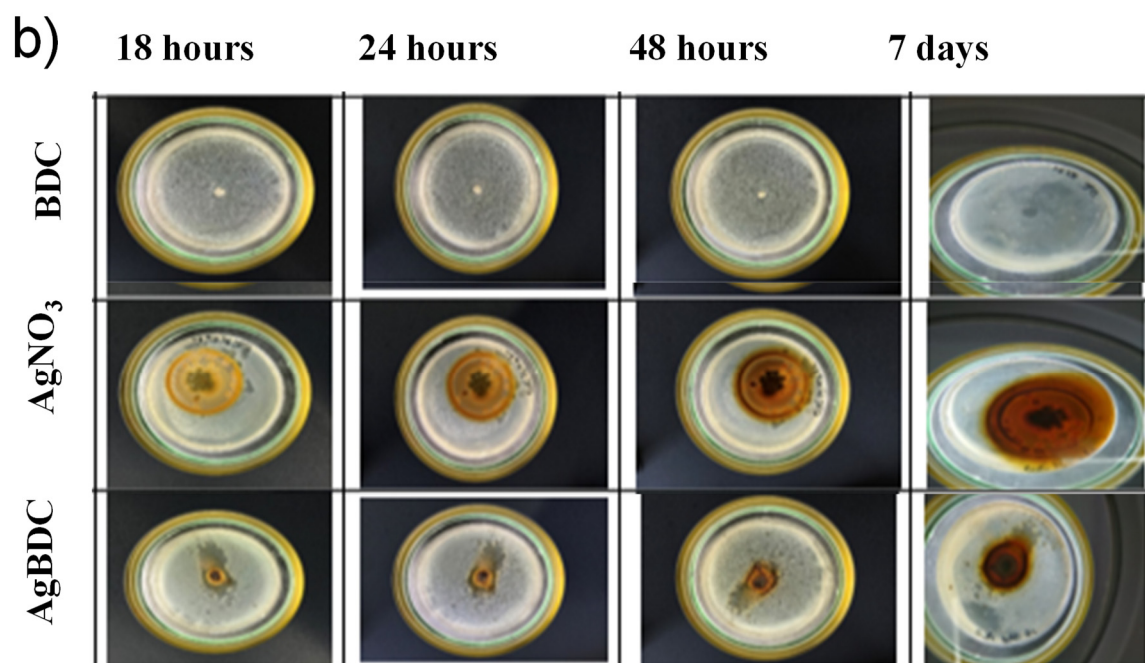

**Figure S8.** Representative images of inhibition halo with time of BDC, AgNO<sub>3</sub> and AgBDC MOF against (a) *S. aureus* and (b) *E. coli*.

**Table S1.** Determination of planktonic *E. coli* bacterial viability by plate count after 18 h in contact with the controls AgNO<sub>3</sub> and BDC in suspension, expressed as CFU·mL<sup>-1</sup>, inhibition% (with respect to the control CFU·mL<sup>-1</sup>) and Log<sub>10</sub>(CFU·mL<sup>-1</sup>).

| Sample            | Concentration (ppm) | CFU·mL <sup>-1</sup> | Inhibition (%) | Log <sub>10</sub> (CFU · mL <sup>-1</sup> ) |
|-------------------|---------------------|----------------------|----------------|---------------------------------------------|
| Control           | 0                   | 5.78E+09             | 0.00           | 9.76                                        |
| AgNO <sub>3</sub> | 20                  | 8.97E+08             | 84.48          | 0.83                                        |
|                   | 50                  | 3.41E+04             | 99.999         | 0.30                                        |
|                   | 100                 | 1,17E+02             | 99.99999       | 0.17                                        |
|                   | 200                 | 3.58E+00             | 99.9999999     | 0.12                                        |
| BDC               | 20                  | 2.02E+09             | 65.13          | 9.30                                        |
|                   | 50                  | 1.63E+08             | 97.17          | 8.21                                        |
|                   | 100                 | 3.72E+08             | 93.57          | 8.57                                        |
|                   | 200                 | 6.21E+08             | 89.26          | 8.79                                        |

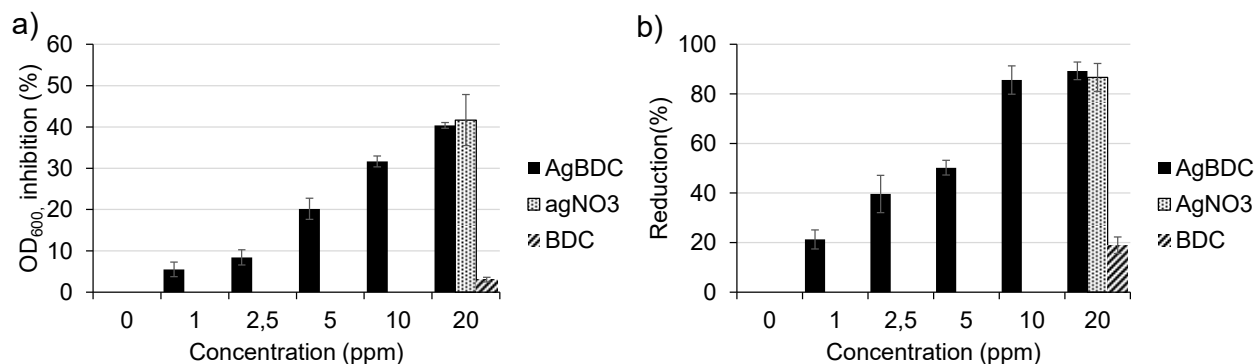

**Figure S9.** AgBDC bactericide activity in suspension against *E. coli* after 18 h incubation at 37 °C. In (a) bacterial viability inhibition determined by OD<sub>600</sub> and (b) enzymatic activity reduction determined from FDA fluorescent emission ( $\lambda_{\text{ex}}$  485 nm;  $\lambda_{\text{em}}$  538 nm).

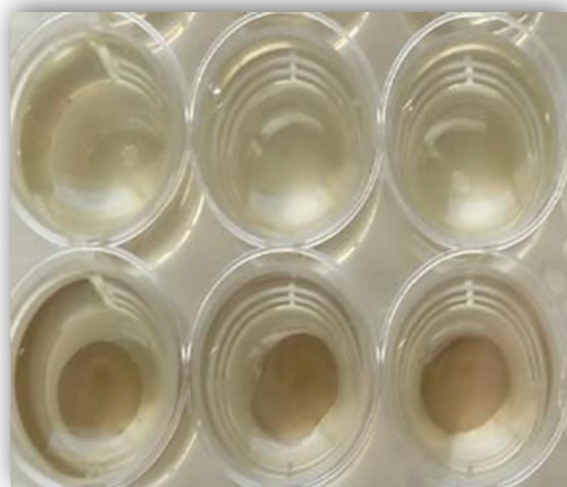

**Figure S10.** Control glass discs and AgBDC thin film coating with *E. coli* inoculum in a 24-well plates.

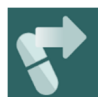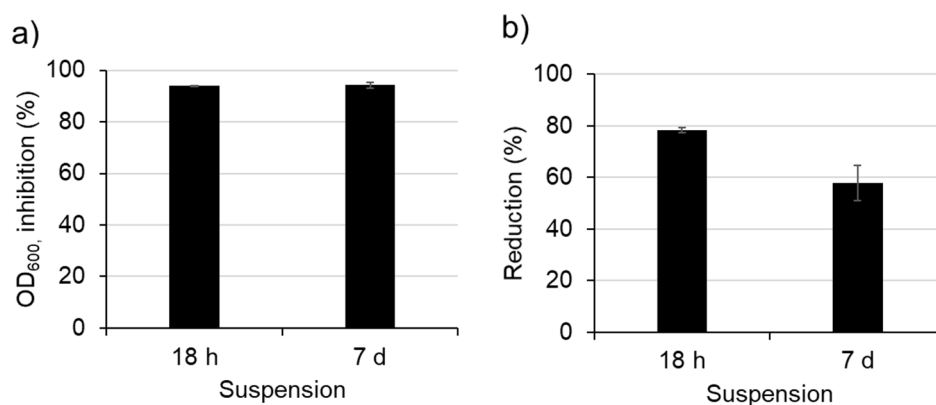

**Figure S11.** Colony forming units·mL<sup>-1</sup> (represented as the logarithm ratio, being C<sub>0</sub> the CFU·mL<sup>-1</sup> of the positive control for better comparison) of the *E. coli* suspension (planktonic bacteria) and *E. coli* biofilm detached from the surface of the AgBDC thin film coating, after (a) 18 h of incubation and (b) 7 days of incubation at 37 °C.

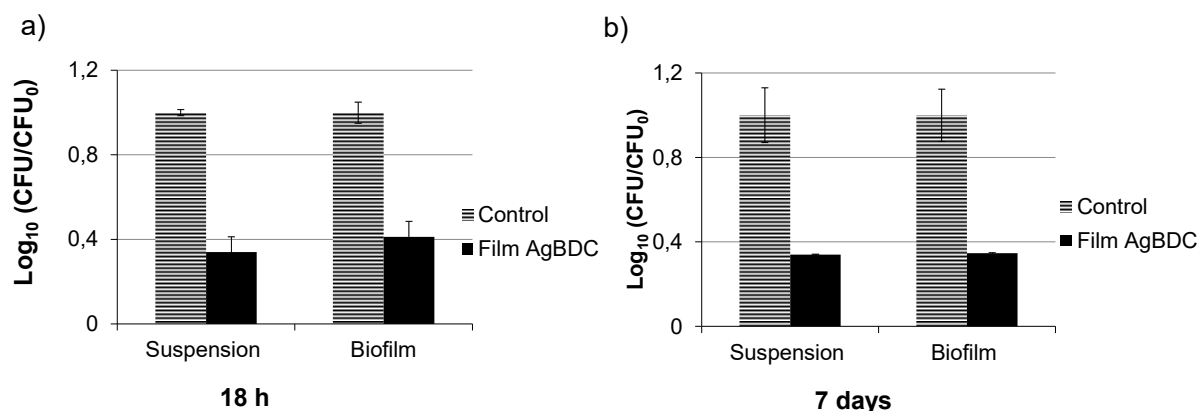

**Figure S12.** AgBDC thin film bactericide activity against *E. coli* after 18 h and 7 days of incubation at 37 °C (a) bacterial viability inhibition determined by OD<sub>600</sub> and (b) enzymatic activity reduction determined from FDA fluorescent emission ( $\lambda_{\text{ex}}$ : 485 nm;  $\lambda_{\text{em}}$ : 538 nm).

**Table S2.** Compilation of Ag-based MOFs biocide activity against different microorganisms both in planktonic and sessile state.

| MOF                                                               | MIC MOF ppm [Ag ppm]              | Microorganism        | State      | Reference |
|-------------------------------------------------------------------|-----------------------------------|----------------------|------------|-----------|
| [(AgL)NO <sub>3</sub> ] $\cdot$ 2H <sub>2</sub> O                 | 300 [38] // 297 [38]              | <i>E. coli</i> //    | Planktonic | [25]      |
| [(AgL)CF <sub>3</sub> SO <sub>3</sub> ] $\cdot$ 2H <sub>2</sub> O | 300 [35] // 307 [36]              | <i>S. aureus</i>     |            |           |
| [(AgL)ClO <sub>4</sub> ] $\cdot$ 2H <sub>2</sub> O                | 308 [38] // 293 [37]              |                      |            |           |
| Ag <sub>3</sub> [C <sub>7</sub> H <sub>4</sub> O <sub>5</sub> P]  | 26 [16] // 26 [16] * <sup>1</sup> | <i>E. coli</i> //    | Planktonic | [26]      |
|                                                                   |                                   | <i>S. aureus</i>     |            |           |
| [Ag( $\mu$ <sub>3</sub> -PTA=S)] <sub>n</sub>                     | 4 [1,2] // 20 [6] // 5            | <i>E. coli</i> //    | Planktonic | [27]      |
| (NO <sub>3</sub> ) <sub>n</sub> ·nH <sub>2</sub> O                | [1.5]                             | <i>S. aureus</i> //  |            |           |
|                                                                   |                                   | <i>P. aereginosa</i> |            |           |



|                                                                                                                           |                                                                          |                                                                 |                      |      |
|---------------------------------------------------------------------------------------------------------------------------|--------------------------------------------------------------------------|-----------------------------------------------------------------|----------------------|------|
| $[Ag_4(\mu_4\text{-PTAL=S})(\mu_5\text{-PTA=S})(\mu_2\text{-SO}_4)_2(\text{H}_2\text{O})_2]_n \cdot 2n\text{H}_2\text{O}$ | 20 [8] // 40 [16] // 20 [8]                                              |                                                                 |                      |      |
| $[Ag_2(3\text{-NPTA})(bipy)_{0.5}(\text{H}_2\text{O})]$                                                                   | 15 [6] // 20 [8]                                                         | <i>E. coli</i> // <i>S. aureus</i>                              | Planktonic           | [24] |
| $[Ag_2(\text{O-IPA})(\text{H}_2\text{O}) \cdot (\text{H}_3\text{O})]$<br>$[Ag_5(\text{PYDC})_2(\text{OH})]$               | 10 [5] // 15 [7.5]<br>15 [9] // 20 [12]                                  | <i>E. coli</i> // <i>S. aureus</i>                              | Planktonic           | [28] |
| AgTAZ                                                                                                                     | 50 [30.5] // 50 [30.5] // 50 [30.5]                                      | <i>Synechococcus</i><br><i>Anabaena</i><br><i>Chlamydomonas</i> | Planktonic           | [29] |
| AgBTC                                                                                                                     | 96 % // 90 % *2                                                          | <i>E. coli</i> // <i>S. aureus</i>                              | Sessile              | [14] |
| AgBTC                                                                                                                     | 16 [2.4] // 32 [4.8]                                                     | <i>E. coli</i> // <i>B. subtilis</i>                            | Planktonic           | [20] |
| AgBTC                                                                                                                     | 50 [7.5] // 50 [7.5]                                                     | <i>E. coli</i> // <i>B. subtilis</i>                            | Planktonic           | [30] |
| AgBTC                                                                                                                     | -                                                                        | <i>E. coli</i>                                                  | Sessile              | [15] |
| AgBDC-NH <sub>2</sub>                                                                                                     | -                                                                        | <i>E. coli</i>                                                  | Sessile              | [16] |
| Ag-2imi<br>Ag-Benzimi<br>Ag-imi                                                                                           | 90 [13.5] // 85 [12.75]<br>75 [11.3] // 65 [9.8]<br>85 [12.8] // 80 [12] | <i>E. coli</i> // <i>B. subtilis</i>                            | Planktonic           | [31] |
| $[Ag_2(\text{O-IPA})(\text{H}_2\text{O})] (\text{H}_3\text{O})$<br>$[Ag_2(bpe)_2(\text{Cl})_2]$                           | 5<br>25                                                                  | <i>E. coli</i>                                                  | Planktonic           | [21] |
| Ag-2imi                                                                                                                   | 60% *2                                                                   | <i>E. coli</i>                                                  | Sessile              | [18] |
| AgBDC-NH <sub>2</sub>                                                                                                     | 90% // 96% *3                                                            | <i>E. coli</i> // <i>S. aureus</i>                              | Sessile              | [17] |
| $Ag_2[\text{HBTC}][\text{imi}]$                                                                                           | 100 [50] // 150 [75] // 25 [12.5]                                        | <i>E. coli</i> // <i>S. aureus</i> // <i>P. auresginosa</i>     | Planktonic & sessile | [19] |





|                                          |                                          |                                              |            |      |
|------------------------------------------|------------------------------------------|----------------------------------------------|------------|------|
| Ag <sub>2</sub> Cedcp                    | 38 [18] // 38 [18] // 38 [18] // 38 [18] | <i>E. coli</i> //<br><i>S. aureus</i> //     | Planktonic | [32] |
| Ag <sub>4</sub> Cmdcp                    | 10 [4] // 10 [4] // 10 [4] // 10 [4]     | <i>P. aureginosa</i> //<br><i>M. albican</i> |            |      |
| Ag-2imi                                  | 42 %<br>76 % <sup>*3</sup>               | <i>E. coli</i>                               | Sessile    | [33] |
| Ag-2imi                                  | 80 %<br>90% <sup>*3</sup>                | <i>E. coli</i>                               | Sessile    | [22] |
| Ag <sub>6</sub> MTB <sub>6</sub>         | -                                        | <i>E. coli</i> //<br><i>S. aureus</i>        | Planktonic | [34] |
| Ag <sub>5</sub> (PYDC) <sub>2</sub> (OH) | -                                        | <i>E. coli</i> //<br><i>S. aureus</i>        | Planktonic | [23] |
| Ag-2imi                                  | -                                        | -                                            | Sessile    | [35] |

<sup>\*1</sup> MBC; <sup>\*2</sup> % of reduction of CFU; <sup>\*3</sup> % of red cell on CLSM.

**Legend:** L: tris-(4-pyridylduryl)borane; PTA=S: 1,3,5-triaza-7-phosphaadamantane-7-sulfide; bipy : 4,4'-bipyridyl; H<sub>2</sub>NPTA : 3-/4-nitrophthalic acid; HO-H<sub>2</sub>IPA : 5-hydroxyisophthalic acid; H<sub>2</sub>PYDC : pyridine-3, 5-dicarboxylic acid; TAZ: triazole; BTC: 1,3,5-benzenetricarboxylic acid; BDC: Benzene 1,4-dicarboxylic acid; 2imi: methylimidazolate; H<sub>3</sub>CedcpBr :N-(carboxyethyl)-(3,5-dicarboxyl)-pyridinium bromide; H<sub>3</sub>CmdcpBr: N-(carboxymethyl)-(3,5-dicarboxyl)-pyridinium bromide; HMBT: 2-mercaptobenzothiazole.
